# The *Ry<sub>sto</sub>* immune receptor recognizes a broadly conserved feature of potyviral coat proteins

Marta Grech-Baran<sup>1\*</sup>, Kamil Witek<sup>2</sup>, Jarosław Poznański<sup>1</sup>, Anna Grupa-Urbańska<sup>1</sup>, Tadeusz Malinowski<sup>3</sup>, Małgorzata Lichocka<sup>1</sup>, Jonathan DG Jones<sup>2</sup>, Jacek Hennig<sup>1</sup>

<sup>1</sup>Institute of Biochemistry and Biophysics, Polish Academy of Sciences,  
Pawińskiego 5a, 02-106 Warsaw, Poland

<sup>2</sup>The Sainsbury Laboratory, University of East Anglia, Norwich Research Park, Norwich, NR4 7UK, UK

<sup>3</sup>Institute of Pomology and Floriculture, 96-100, Skierniewice, Poland

\*To whom correspondence should be directed

E-mail:

mgrech@ibb.waw.pl

## Abstract

Potviruses are the largest group of plant RNA viruses, causing significant losses in many crops. Among them, potato virus Y (PVY) is particularly important, and enhances the severity of infections by other viruses. The *Ry<sub>sto</sub>* gene confers PVY resistance and encodes a TIR-NLR intracellular immune receptors that recognizes PVY coat protein (CP). To define a minimal CP fragment sensed by *Ry<sub>sto</sub>*, we created a series of truncated CP variants and expressed these CP derivatives in *Ry<sub>sto</sub>* transgenic plants. Deletions that affect the 149 amino acid CP core region lose the ability to trigger *Ry<sub>sto</sub>*-dependent defence activation. Furthermore, point mutations in the amino acid residues Ser<sub>126</sub>, Arg<sub>157</sub>, and Asp<sub>201</sub> of the highly conserved RNA-binding pocket of potyviral CP, reduce or abolish *Ry<sub>sto</sub>*-dependent responses, demonstrating that appropriate folding of the CP core is required for *Ry<sub>sto</sub>*-mediated recognition. Consistent with these data, we found *Ry<sub>sto</sub>* recognises CPs of various viruses that share a similar core region, but not those lacking it. Finally, we demonstrated that *Ry<sub>sto</sub>* provides immunity to plum pox virus and turnip mosaic virus, demonstrating its wide range of applications in disease-resistant crop engineering. In parallel, we showed that CP triggered *Ry<sub>sto</sub>* activation is SAG101- but not PAD4- or SA-level dependent. Our findings shed new light on how R proteins can detect viruses by sensing highly conserved structural patterns.

## Key words

*Ry<sub>sto</sub>*, potato virus Y, coat-protein structure, cell death, salicylic acid, potyvirus resistance engineering

## Introduction

The plant immune system is a multilayered detection and signalling network. To successfully restrict and thwart viruses, plants use RNA silencing, translation repression, and *Resistance* (*R*) gene-mediated mechanisms (Wersch et al., 2020; Leisner and Schoelz, 2018). Most plant *R* genes encode intracellular nucleotide-binding leucine-rich repeat (NLR) receptors. Some of these receptors carry an N-terminal TIR domain and are termed TNLs, whereas CNLs carry an N-terminal coiled-coil domain (Jones et al., 2016). A growing body of evidence suggests that in plants, as in mammals, NLR activation results from induced oligomerization of NLRs to form signalling-active scaffolds (Saur et al., 2020). Recent structural elucidation of the CNL: HOPZ-ACTIVATED RESISTANCE1 (ZAR1) and TNL-type: ROQ1 (recognition of XopQ 1) and RPP1 (Resistance to *Peronospora parasitica* 1) immune receptors provided new insights into plant immune receptor activation (Wang et al., 2019; Martin et al., 2020). ZAR1 is as an ADP-bound monomer in the resting state and after activation forms a pentameric “resistosome” (Wang et al., 2019). ROQ1 and RPP1, when activated, form tetrameric complex (Martin et al., 2020; Ma et al., 2020). Historically, pathogen gene products that are detected by matching NLR receptors were named avirulence (Avr) factors (Flor, 1956; Wersch et al., 2020). The activation of NLRs leads to a suite of downstream defence responses, frequently culminating in a hypersensitive cell death response (HR) at the infection site (Lolle et al., 2020). This model of resistance is often referred to as effector-triggered immunity (ETI) and involves NLR-dependent direct or indirect pathogen recognition (Zipfel, 2014). The majority of viral effectors is functionally represented by movement proteins, replicases, and coat proteins (CPs), with all playing various roles over the course of the infection (Leisner et al., 2018). Due to the small size of the viral genome, some of the proteins might be multifunctional, like the P6 protein of the cauliflower mosaic virus, which facilitates several steps of the infection, including modulation of host defences (Leisner and Schoelz, 2018). Despite progress made over the last decade, the relationship between the function of recognized viral proteins and their perception by NLRs still needs to be addressed.

Potyviruses are the largest genus of plant viruses infecting a broad range of dicot and monocot crops (Hoffius et al., 2007). Potato virus Y (PVY), plum pox virus (PPV), turnip mosaic virus (TuMV), papaya ringspot virus; (PRSV), soybean mosaic virus (SMV), sweet potato feathery mottle virus (SPFMV) and others cause billions of dollars worth of annual losses worldwide (da Silva et al., 2020). One of the most extensively studied, potato virus Y (PVY) is the most damaging viral pathogen of Solanaceae crops (da Silva et al., 2020). Infective PVY virions are flexuous filaments where coat protein (CP) subunits assemble in a helical mode and are bound to a monopartite positive-sense single-stranded (ssRNA) genome (Zamora et al., 2017). The CP, apart from its principal role as a structural protein of the virion,

is also involved in transmission by aphids, and movement and regulation of viral RNA amplification (Revers et al., 2015).

Several mechanisms for the perception of viruses by R proteins have been proposed. Some NLR proteins may recognise more than one effector from various pathogens. For instance, Rx, a resistance protein against potato virus X (PVX), sensed the conserved CP motifs from various potexviruses, except the PVX<sub>HB</sub> strain (Baures et al., 2008). Similarly, the N protein that confers resistance against the tobacco mosaic virus (TMV) via recognition of the helicase domain of TMV replicase (p50), can perceive several tobamoviruses (Whitham et al., 1994). Next, R gene loci carrying allelic variants encoding proteins may also recognize distinct effectors (Le Roux et al., 2015). Likewise, L proteins, which recognise tobamoviral CPs (Cooley et al., 2000; Tomita et al., 2008), and HRT or RCY-1, at the Arabidopsis RPP8 locus, confer resistance to turnip crinkle virus (TCV) and cucumber mosaic virus (CMV), respectively (Takahashi et al., 2002). In turn, the *Magnaporthe oryzae* effectors Avr-Pia, Avr1-CO39, Avr-PikD, and AvrPiz-t, despite being sequence-unrelated, share the same architecture and all bind to the rice resistance protein Pik-1 via HMA domains (Bialas et al., 2020; Maqbool et al., 2015). Similarly, five AvrPm3 effector proteins from wheat powdery mildew form a large group of proteins with low sequence homology but structural similarity that are perceived by the wheat NLR receptor PM3 (Bourras et al., 2019). Nevertheless, the question of whether the way the receptor recognizes Avr influences the range of its mediated immunity remains to be fully addressed.

We previously showed that the TNL immune receptor Ry<sub>sto</sub> perceives the PVY CP and is required for PVY-triggered immunity (Grech-Baran et al., 2020). Ry<sub>sto</sub> confers an extreme resistance response in potato that prevents viral replication without triggering cell death. Nonetheless, overexpression of the PVY CP in Ry<sub>sto</sub>-expressing plants can trigger a macroscopic HR in heterologous systems, such as *Nicotiana tabacum*. To date, the molecular mechanism of Ry<sub>sto</sub>-triggered immunity is largely unknown. We show here that Ry<sub>sto</sub> perceives a specific molecular pattern that is similar in multiple potyviruses. Hence, it may serve as a rapid selectable marker in Ry<sub>sto</sub>-conferred immunity. Furthermore, we revealed that Ry<sub>sto</sub> might be used to develop durable potyviral disease resistance. In parallel, we shed light on new elements of the signalling mode of Ry<sub>sto</sub>-mediated immune response.

## Results

### The core region of CP is both necessary and sufficient for eliciting cell death in *Ry<sub>sto</sub>* transgenic plants

To discover the molecular mechanisms underlying PVY CP perception by the *Ry<sub>sto</sub>* protein, a PVY CP structural model (Protein Data Bank 6HXX) was analysed using the YASARA structure package (Krieger and Vriend, 2014). A single PVY CP unit consists of 267 amino acids with a globular core subdomain defined from Q<sub>77</sub> to K<sub>226</sub> that forms seven  $\alpha$ -helix folds and a  $\beta$ -hairpin. This central domain is flanked by putative disordered regions comprising 76 and 41 amino acid residues at the N- and C-termini, respectively (Fig. 1a, Suppl. Fig. 1). To determine which CP region is recognised by *Ry<sub>sto</sub>*, the truncated CP variants CP<sub>77-267</sub>, CP<sub>1-226</sub>, and CP<sub>77-226</sub>, as well as the full CP, were cloned and expressed in *Ry<sub>sto</sub>* *Nicotiana tabacum* and control, non-transgenic plants (Fig. 1a). Neither the N- nor C-terminus of PVY CP was required to elicit the response in *Ry<sub>sto</sub>* *N. tabacum*, because the CP<sub>77-226</sub> mutant still induced cell death (Fig. 1b). Based on the *in silico* model, we removed two amino acids from each end of the CP (CP<sub>79-226</sub> or CP<sub>77-224</sub>) because this was predicted to disrupt the distal  $\alpha$ -helices and likely hamper recognition by distorting the CP structure. Neither of these truncated constructs could elicit cell death in *Ry<sub>sto</sub>* *N. tabacum* (Fig. 1b, c), indicating that the full-length CP core region is required for perception by *Ry<sub>sto</sub>*.

### Conserved putative core CP residues at the protein-RNA interface are required for eliciting cell death in *Ry<sub>sto</sub>* *N. tabacum* plants

The cryo-EM model of PVY (Kežar et al., 2019) suggested that the structure of PVY virions is stabilised by protein-ssRNA interactions involving the conserved residues S<sub>125</sub>, R<sub>157</sub>, and D<sub>201</sub> at the ssRNA binding site of the CP core (Fig. 2a). Because the universally conserved RNA-binding pocket might be essential for capsid assembly and viral genome packaging (Zamora et al., 2017), we decided to investigate the role of the conserved residues in *Ry<sub>sto</sub>*-mediated CP core detection. Single (S<sub>125</sub>A, R<sub>157</sub>D, and D<sub>201</sub>R), double (S<sub>125</sub>A\_R<sub>157</sub>D and S<sub>125</sub>A\_D<sub>201</sub>R), or triple (S<sub>125</sub>A\_R<sub>157</sub>D\_D<sub>201</sub>R) amino acid substitutions were generated using site-directed mutagenesis. Following the transient expression of PVY CP mutants in *Ry<sub>sto</sub>* plants, three phenotypes were observed. A typical cell death phenotype was observed for the single substitutions S<sub>125</sub>A and R<sub>157</sub>D, whereas the R<sub>157</sub>D mutant and each of the double variants partially retained CP recognition, and triggered weaker cell death. In contrast, no cell death was observed when the triple mutant was tested (Fig. 2b). Expression of all proteins was confirmed by western blot analysis (Fig. 2c).

To quantify the *Ry<sub>sto</sub>*-mediated cell death response to the CP mutants, all CP versions were transiently expressed in *Ry<sub>sto</sub>*-expressing tobacco leaves and electrolyte leakage was measured at 18, 21, 24, 27, and 30 h after infiltration (hpi). Full-length PVY CP was used as a control. All single and double mutants

followed the conductivity pattern of the wild-type (WT) CP, with the maximum conductivity detected at 27 hpi, although the ion leakage was lower than that of the control at every time point, especially in the single and double mutants with the D<sub>201</sub>R mutation. As expected, the triple S<sub>125</sub>A\_R<sub>157</sub>D\_D<sub>201</sub>R mutant activated no ion leakage (Fig. 3a). This supports the hypothesis that the S<sub>125</sub>, R<sub>157</sub>, and D<sub>201</sub> pocket is essential for proper folding of the PVY CP central core region and, consequently, for Ry<sub>sto</sub>-mediated recognition.

The expression of defence-related marker genes *HSR203J* and *HIN-1* (Chichkova et al., 2004) was tested by quantitative polymerase chain reaction (qPCR) at 18, 24, and 30 hpi. In Ry<sub>sto</sub> tobacco infiltrated with WT CP, the steady-state levels of both genes were at a maximum at 18 hpi and gradually decreased. All single and double mutants showed a significant decrease and delay in *HSR203J* and *HIN-1* expression. The observed changes were less pronounced in R<sub>157</sub>D and S<sub>125</sub>A/R<sub>157</sub>D in comparison with other mutated CP versions (Fig. 3b). Consistent with the observed phenotype, the triple mutant was unable to induce *HSR203J* and *HIN-1* expression (Fig. 3b).

Finally, ROS production following Ry<sub>sto</sub> elicitation was measured. Surprisingly, the level of O<sub>2</sub><sup>-</sup> at 18 hpi was higher in R<sub>157</sub>D and S<sub>125</sub>A\_R<sub>157</sub>D than in WT CP (Fig. 3c). Similarly, at 24 hpi, it remained elevated in comparison to that in WT CP or other mutants, which exhibited an impaired oxidative burst. The triple mutant did not activate an oxidative burst at any of the tested time points (Fig. 3c).

Taken together, these results suggest that mutations in the highly conserved amino acids of the CP core impaired or abolished the cell death phenotype in Ry<sub>sto</sub> plants by disturbing the three-dimensional structure.

### **The EDS1-SAG101-NRG1 node is indispensable for Ry<sub>sto</sub> CP triggered immunity**

TNLs utilise a network of helper NLRs for a fully effective immune response. Two distinct complexes (NRG1/EDS1/SAG101 and ADR1/EDS1/PAD4) are required to execute TNL-initiated immunity (Sun et al., 2020); Ry<sub>sto</sub> is no exception (Grech-Baran et al., 2020). To further investigate whether PAD4 or SAG101 are required for Ry<sub>sto</sub>-CP triggered response we transiently co-expressed Ry<sub>sto</sub> with PVY CP or its triple inactive mutant in *pad4* or *pad4/sag101b* *N. benthamiana* and then quantified the HR (Fig. 4, Suppl. Fig. 8; Gantner et al., 2019). Ry<sub>sto</sub>-CP co-expression in *pad4* and WT *N. benthamiana* resulted in clear HR, while double *pad4/sag101b* knockouts remained symptomless (Fig. 4a). The triple CP mutant did not trigger any cell-death symptoms regardless of the background (Fig. 4a, b). Although, we observed some small reduction in the size of HR lesions in the *pad4* background, as compared to WT (Fig. 4b), it did not alter local Ry<sub>sto</sub>-CP resistance response activation. Thus, we conclude that SAG101 but not PAD4 is necessary for CP-triggered Ry<sub>sto</sub> HR.

### **SA activation but not accumulation is required for CP-triggered immunity in *Ry<sub>sto</sub>* plants**

SA is a crucial signalling molecule in the activation of plant immunity (Durner et al., 1997). To determine whether SA is involved in the initiation of the local *Ry<sub>sto</sub>*-mediated response, free SA levels were measured in *Ry<sub>sto</sub>* tobacco plants after overexpression of WT CP or the inactive mutant at different time points (18, 24 and 30 hpi) and temperatures (22 and 30°C). SA levels were significantly elevated from 24 hpi in leaves expressing CP at both temperatures, as compared to the mutant variant and mock-treated plants (Fig. 5a). Interestingly, the SA increase was less pronounced at 30°C (Fig. 5a). We have shown that transiently expressed *Ry<sub>sto</sub>* can trigger cell death in PVY-infected SA-deficient (*NahG*) *N. benthamiana* plants (Grech-Baran et al., 2020). To further explore the role of SA in *Ry<sub>sto</sub>*-triggered immunity, CP and *Ry<sub>sto</sub>* were co-expressed in *NahG* or control tobacco plants. SA-deficient plants developed cell death symptoms similar to that of the controls (Fig. 5b). Furthermore, no significant differences in plasma membrane integrity or macroscopic tissue collapse were observed (Fig. 5c). These results suggest that even though the PVY CP triggers SA accumulation in *Ry<sub>sto</sub>*-expressing tobacco plants, the *Ry<sub>sto</sub>*-CP-related cell death is independent of SA accumulation. Similar results were obtained in *N. benthamiana* plants (Suppl. Fig. 2).

### ***Ry<sub>sto</sub>* recognises a range of CPs from multiple potyviruses**

To determine whether CP of PVY shares structural similarities with other members of the *Potyvirus* genus, we constructed a phylogenetic tree of CPs from 65 potyviruses, which revealed a considerable divergence in their amino acid sequences (Fig. 6a, Suppl. Fig. 3). Despite the low similarity at their N- and C-termini, the central subdomain and the amino acids predicted to interact with ssRNA are conserved among all studied potyviruses (Fig. 6b, Suppl. Fig. 4, 5).

To test whether the structural similarities of CPs result in their recognition by *Ry<sub>sto</sub>*, we selected 10 economically important potyviruses from distantly related clades: PRSV, papaya ringspot virus; PVM, potato virus M; SMV, soybean mosaic virus; PepSMV, pepper severe mosaic virus; BCMNV, bean common mosaic necrosis virus; MDMV, maize dwarf mosaic virus; SCMV, turnip mosaic virus; TuMV, pea-seed born mosaic virus; SPFMV, sweet potato feathery mottle virus and PPV, plum pox virus. The sequences encoding these viral CPs were cloned and transiently expressed in transgenic *Ry<sub>sto</sub>* or control tobacco plants. Within three days, cell death development was observed in *Ry<sub>sto</sub>* plants for all tested CPs, whereas the controls remained symptomless (Fig. 6c). The expression of the viral proteins was confirmed by immunoblotting (Fig. 6d).

These results demonstrate that *Ry<sub>sto</sub>* has a broad recognition spectrum and thus has considerable agronomic potential to control a number of economically significant potyviruses.

### **A conserved potyviral CP core architecture is necessary for *Ry<sub>sto</sub>*-mediated recognition**

To define the range of the *Ry<sub>sto</sub>* mediated viral CP recognition, we tested the CP of ugandan cassava brown streak virus (CBSV; FJ185044.1) from *Ipomovirus* genus of the Potyviridae family (Monger et al., 2001). Structural modelling of CBSV CP revealed its low homology to the PVY CP structure, with significant differences in the central core region (Fig. 7a, b). Since CBSV CP does not have the strictly conserved LARY (A/G) FDFYE sequence, it cannot form the proper RNA binding pocket structure, resulting in a different core folding pattern (Fig. 2a, Fig. 7a). We tested whether this might result in lack of recognizability by *Ry<sub>sto</sub>* (Fig. 7c) by cloning CBSV CP and transiently expressing it in transgenic *Ry<sub>sto</sub>* and control tobacco plants. Although we could detect CBSV CP accumulation, no cell death was observed (Fig. 7c, d), consistent with the interpretation that recognition is dependent on the highly conserved CP core architecture in PVY and its closer relatives.

### ***Ry<sub>sto</sub>* restricts the systemic spread of PPV and TuMV**

To test whether *Ry<sub>sto</sub>* mediated recognition of the range of potyviral CPs also enables resistance against potyviruses other than PVY, we chose two economically important viruses, PPV and TuMV. PPV, a causative agent of Sharka disease, is the most important viral disease of stone fruit crops worldwide (Maejima et al., 2020), while TuMV damages various *Brassicaceae* and other crops (Palukaitis and Kim, 2021).

Although PPV is unable to infect tobacco systemically, it can replicate in inoculated leaves (Saenz et al., 2002). We site-inoculated leaves of transgenic *Ry<sub>sto</sub>* and control tobacco plants with a severe PPV isolate (DSMZ No.: PV-0001). Seven days after infection, *Ry<sub>sto</sub>* plants exhibited a local cell death response, while no HR was detected in controls (Fig. 8a). To investigate the specificity of *Ry<sub>sto</sub>*-mediated recognition, *Ry<sub>sto</sub>* and control tobacco leaves were site-inoculated with two other PPV isolates (PV-0001 and PV-2233 DSMZ). Western blot analysis did not detect PPV proteins in samples from the neighbouring leaf zones of *Ry<sub>sto</sub>* plants at 7 and 14 dpi whereas in non- transgenic control samples viral proteins were detected (Fig. 8b). To further validate *Ry<sub>sto</sub>*-mediated PPV resistance, we delivered a full-length PPV cDNA clone tagged with GFP into transgenic *Ry<sub>sto</sub>* and control tobacco plants by agroinfiltration. No GFP fluorescence was detected in the infiltrated leaves of *Ry<sub>sto</sub>* plants, whereas a strong signal was observed in control leaves (Fig. 8c).

Unlike PPV, TuMV is able to infect *N. tabacum* systemically (Modarresi et al., 2019). Thus, after agroinfiltration of transgenic *Ry<sub>sto</sub>* and control plants with a TuMV-GFP clone, GFP fluorescence and viral protein accumulation were monitored in upper, non-infiltrated leaves. At 21 dpi, no signal was detected in the *Ry<sub>sto</sub>* plants, while control plants showed intense fluorescence (Fig. 9a). Similarly, western blot did not detect the viral proteins presence in transgenic *Ry<sub>sto</sub>* plants (Fig. 9b).



Taken together, our results demonstrate that *Ry<sub>sto</sub>* immune receptor can trigger resistance against multiple potyviruses. We propose that *Ry<sub>sto</sub>*-CP interactions may represent one of the possible universal models of perception in which a single R receptor can recognise diverse Avr factors using a well-conserved element as a molecular target.

## Discussion

How NLRs sense pathogens and activate immunity is a fundamental question in plant immunity and disease resistance (Hu et al., 2020; Jones et al., 2016). The *Ry<sub>sto</sub>* TIR-NLR receptor, which perceives conserved structural elements of the CPs of multiple potyviruses, may provide a useful model to understand how NLRs convert recognition to defence activation, and cope with the rapid evolution of viral pathogens.

Potviruses are the second largest group of plant viruses, causing severe losses in many crops (Gadhave et al., 2020). Interestingly, they share a CP folding pattern that is widely distributed in eukaryotic viruses, including influenza viruses (Agirrezabala et al., 2015). As the CP features in virion assembly, RNA silencing and viral translation, it constitutes a potential universal target for R proteins (Zamora et al., 2015).

We identified the CP of PVY as the recognized component that triggers an *Ry<sub>sto</sub>*-mediated defence response in potato and other *Solanaceae* (Grech-Baran et al., 2020). Recent crystallographic studies of PVY CP revealed a disordered nature of N- and C-terminal ends and a conserved folding of its core (Kezar et al., 2019). Additionally, the N-terminal DAG motif was found to be indispensable for Potyviridae transmissibility (Revers et al., 2015). Our results provide evidence that only the 149 amino acid CP core region is required for *Ry<sub>sto</sub>* perception, which is consistent with the preservation of its structure among the majority of potyviruses.

Many viral proteins execute multiple roles in the replication process, as well as in the suppression of plant defences (Leisner and Schoelz, 2018). In many cases, a combination of structural features creates defined motifs exerting particular functions (i.e., RNA binding), conserved in proteins from virtually all organisms (Navarro et al., 2020; Zamora et al., 2015). Such structure-function relationships are yet to be elucidated for many R-Avr interactions. It has been previously shown that a minimal fragment of 90 aa of PVX CP, encompassing four alpha helices, is sufficient to trigger Rx-mediated resistance (Nemykh et al., 2008). This suggests that the Rx sensing machinery targets conserved structural elements rather than particular sequence motifs (Baures et al., 2008). However, a single or double mutation in tobamoviral CP can disrupt R-gene-mediated resistance (Antignus et al., 2008), suggesting that certain residues and sequence motifs are crucial for triggering the response.



The S<sub>125</sub>, R<sub>157</sub>, and D<sub>201</sub> residues that bind to ssRNA of potyviruses are crucial for proper tertiary folding of PVY CP (Zamora et al., 2017). Here, we showed that a single or double substitution of these amino acids impaired the cell death phenotype in *Ry<sub>sto</sub>* plants, whereas the triple mutant completely abolished it. The macroscopic HR phenotype was found to correlate with changes in the expression of defence-related markers, ion conductivity, and ROS production. Moreover, the mutations in the conserved R and D residues of the CP were shown to impair the *in vitro* assembly of the potyvirus johnsongrass mosaic virus (Jagadish et al., 1993) and to block the assembly and cell-to-cell movement of the potyvirus pepino mosaic virus (Agirrezabala et al., 2015).

R<sub>157</sub> and D<sub>201</sub> residues form salt bridge bonds which contribute to the proper protein structure and specificity of interaction with other biomolecules. In general, disrupting salt bridges is energetically less favourable than reversing them, and may result in a decrease in protein stability (Bosshard et al., 2004). Remarkably, the potentially less stable CP derivative (S<sub>125</sub>A\_R<sub>157</sub>D) was still able to trigger cell death, unlike the presumably more stable triple mutant variant (S<sub>125</sub>A\_R<sub>157</sub>D\_D<sub>201</sub>R) with a reversed salt bridge (Suppl. Fig 6). As both mutant proteins were expressed at similar levels, we propose that the phenotype of the triple mutant might be caused by compromised RNA binding, which in turn affects CP conformation, rather than the stability of the molecule.

Activated plant intracellular NLR receptors form oligomers that are required for immunity signalling that broadly resemble mammalian NLR inflammasome scaffolds (Martin et al., 2020; Ma et al., 2020). Two sub-families of helper NLRs, HeLo domain family (NRG1s and ADR1s) and EDS1 family of plant-specific lipase-like proteins (EDS1, PAD4 and SAG101) mediate defence signalling downstream of sensor TIR-NLRs (Lapin et al., 2019). Recently, it was reported that two distinct modules (NRG1/EDS1/SAG101 and ADR1/EDS1/PAD4) are required for TNLs-mediated immunity (Sun et al., 2020). Here, we provide evidence that *Ry<sub>sto</sub>* mediates immune responses in EDS1-SAG101-NRG1 but not PAD4 dependent manner. A similar mechanism was described for another TNL, Roq1 (Sun et al., 2020).

Another major role of EDS1-PAD4 is to promote SA biosynthesis and activate SA-dependent defence responses (Gantner et al., 2019). We showed that *Ry<sub>sto</sub>*-mediated responses to transient CP expression are independent of SA accumulation, which is consistent with PAD4-independent function. Although transient CP expression in *Ry<sub>sto</sub>* plants was followed by some increase in SA levels, the cell death phenotype observed after the co-expression of *Ry<sub>sto</sub>* with CP in *NahG* plants, suggests that the increase in SA is not required for activation of *Ry<sub>sto</sub>*-triggered response. Recently, it was reported that the NLR-dependent cell death response is strongly enhanced by the activation of surface receptors (Ngou et al., 2021). As viral coat proteins act as PAMPs (Teixeira et al., 2019), and also our *Agrobacterium* transient expression floods leaf apoplastic spaces with bacterial PAMPs, we cannot exclude that the overexpression of PVY CP boosts PTI and, therefore, the local increase in SA levels was independent of

Ry<sub>sto</sub> activation. Alternatively, the dying cells might release signals conditioning adjacent cells to become CP-responsive and activate SA biosynthesis and immunity throughout the entire plant (Radojčić et al., 2018).

Achieving complete and durable resistance is the ultimate goal of resistance breeding. We report here that the PVY CP core region architecture is highly conserved throughout the genus *Potyvirus*. Moreover, we show that the conserved core structure may serve as a rapid molecular marker for predicting the viral targets of Ry<sub>sto</sub>. Therefore, it is not surprising that a gene targeting such a conserved motif is both durable and broad-spectrum (Grech-Baran et al., 2020). Ry<sub>sto</sub> recognises CPs of at least ten economically important potyviruses, including PRSV, PVM, SMV, PepSMV, BCMNV, MDMV, SCMV, TuMV, SPFMV, and PPV, which makes it a desirable candidate to engineer potyviral disease resistance into a range of crops worldwide.

To date, only a few sources of resistance to PPV have been identified, and no R genes were cloned so far (Ilardi et al., 2015; Zuriaga et al., 2018). We show here that Ry<sub>sto</sub>-expressing tobacco plants display resistance to both severe and mild PPV isolates, suggesting that Ry<sub>sto</sub> can be a valid alternative to RNAi-mediated resistance (Hily et al., 2007), provided that consumer resistance and regulatory constraints for GM crops were reduced. Similarly, several resistance genes (including *Tu*, *TuRB01*, *TuRB02*, *TuRB04*) were described for TuMV, but none were cloned so far, and several resistance-breaking strains were described (Palukaitis and Kim, 2021). Like *TuRB04* (Jenner et al., 2002), Ry<sub>sto</sub> confers extreme resistance to TuMV. Our *in silico* analysis, however, suggests that Ry<sub>sto</sub> might resist TuRB04-breaking strains, thus providing a valuable additional candidate for resistance gene stacking to obtain truly broad-spectrum resistance.

Collectively, our study not only provides new insights into the mechanism of the R-gene surveillance system but also offers solutions for crop resistance against potyviruses, which are emerging as one of the most serious challenges of current agriculture, especially as the use of insecticides is becoming more restricted.

## Author contributions

M.G-B., and J.H performed most of the experimental work, data analyses and writing; K.W, J.P. performed bioinformatical analyses, T.M, A. GU performed the research; M.L performed confocal scanning, J.J. and K.W edited the article.

## Materials and Methods

### Plant material

*Nicotiana tabacum* cv. Xanthi-nc, *Ry<sub>sto</sub>* transgenic *N. tabacum* and *Nicotiana benthamiana* plants were grown for 6 weeks in soil under controlled environmental conditions (22°C; 16 h light and 8 h dark) as described previously (Hoser et al., 2013). Transgenic tobacco plants were regenerated following *Agrobacterium tumefaciens* leaf disc transformation as described by Grech-Baran et al. (2020).

### Molecular Modelling

Each of the 10 selected CP proteins of *Potyviridae* were modelled by homology using the algorithm implemented in YASARA structure package (Krieger and Vriend, 2014). In all cases the same three template structures from Watermelon mosaic virus (5ODV), Turnip mosaic virus and (6T34) and Virus-like Particles based on Potato Virus Y (6HXZ) were selected. For each template, up to five alternative sequence alignments were allowed, and up to 50 different conformations were tested for each modified loop. Each of the obtained models was assessed for structural quality (dihedral distribution, backbone, and side-chain packing), and the ones with the highest scores were then used to create a hybrid model that was built using the best fragments (e.g. loops) identified in the particular models. The above procedure was then repeated for the folded parts of the proteins identified in the initial models. The structures of protein complexes with RNA were modelled using as the template two uridine pentanucleotides bound to Watermelon mosaic virus protein (5ODV, molecules a b and A, respectively). In the latter case the side-chain conformation was tuned by the ten succeeding rounds of FoldX 5.0 (<https://doi.org/10.1093/bioinformatics/btz184>) “repairPDB” procedure. Finally, the effect of all single residue replacement of RNA on the stability of the Protein-RNA complex was assessed using RNAscan procedure implemented in the FoldX 5.0.

The phylogenetic tree was generated from protein sequences of the known potyviruses obtained from NCBI. Sequences were aligned using ClustalW 1.7416 and the alignments were imported to the MEGA717 to build a maximum-likelihood phylogenetic tree with Jones-Taylor-Thornton (JTT) substitution model and 100 bootstraps.

### Plasmids generation

The sequences for all the primers used in this study are shown in Supplementary Table 1.

The PVY CP encoding cDNA was amplified by reverse transcription-PCR from total RNA extracted from PVY-infected tobacco leaf tissue as described earlier (Grech-Baran et al., 2020) and inserted into the pENTR/D-TOPO vector (Thermo Fisher Scientific, Waltham, US). The sequence of: Papaya ringspot virus (X67673 - 35K), Potato virus M (M96425.1), Soybean mosaic virus (GT015011), Pepper severe mosaic virus (NC\_008393), Bean common mosaic necrosis virus (AB734777.1), Maize dwarf mosaic virus (AF395135.1), Sunflower chlorotic mottle virus (GU181199.1), Pea-seed born mosaic virus (HQ185577.1), Sweet potato feathery mottle virus (AF015540.1), Turnip mosaic virus (NC\_002509.2), Cassava brown Streak virus (NC\_014791.1) and Plum pox virus (AB576045.1) CPs were synthesized *in vitro* (Twist Bioscience, San Francisco, USA) and inserted into the pENTR/D-TOPO vector. The resulting entry clones were LR recombined with the Gateway pGWB 441, 445 or 411 destination vectors (Nakagawa et al., 2007). Side-directed mutagenesis was used for PVY CP single (CP S<sub>125</sub>A, CP R<sub>157</sub>D and CP D<sub>201</sub>R) as well as double (CP S<sub>125</sub>A/R<sub>157</sub>D, CP S<sub>125</sub>A/D<sub>201</sub>R) or triple (CP S<sub>125</sub>A/R<sub>157</sub>D/D<sub>201</sub>R) mutants generation. The presence of the mutation was confirmed by sequence analysis.

The *Ry<sub>sto</sub>* cDNA sequence was amplified from *Ry<sub>sto</sub>* tobacco plants and inserted into pDONR201 entry vector (Thermo Fisher Scientific) followed by an LR Gateway reaction into the pGWB441 destination vector (Nakagawa et al., 2007).

### Semi-quantitative RT-PCR

Total RNA was treated with DNase I (Thermo Fisher Scientific, Waltham, MA) and subjected to reverse transcription using a mix of random hexamers and oligo-dT primers and a Revert Aid first Strand cDNA Synthesis Kit (Thermo Fisher Scientific). Semiquantitative RT-PCR was performed using DreamTaq (Thermo Fisher Scientific) with 25 to 30 amplification cycles followed by electrophoresis on 2% agarose gel stained with ethidium bromide. Primer pairs used in the PCR reaction are listed in Suppl. Table 1.

### Gene expression analysis- RT-qPCR

Gene expression analysis via RT-qPCR was performed using a LightCycler480 instrument and LightCycler480 SYBR Green Master Kit reagents (Roche, Indiana, IN). Relative gene expression levels were determined using a standard curve method, and the value for each target gene was normalized against the mean expression values of two reference genes, *EF1* and *L23*, as described previously (Liu et al., 2012). Each sample was tested with four technical replicates and two dilutions. Primers for qPCR are provided in Suppl. Table 1.

### Ion Conductivity

At the indicated time points, eight leaf disks (1 cm diameter) were cut from infiltrated zones and floated abaxial side up on 5 ml milliQ water for 10 min at 18°C with gyratory agitation (50 rpm). The conductivity of the water was measured with a WTW InoLab Multi 9310 IDSCDM83 benchtop meter and expressed in  $\mu\text{Scm}^{-1}$ .

#### Cell death scoring

*Agrobacterium tumefaciens* strain GV3101 carrying the appropriate constructs were suspended in infiltration buffer (10 mM MgCl<sub>2</sub>, 10 mM MES, pH 5.6, 150 mM acetosyringone) and mixed prior to infiltration at final OD<sub>600</sub>. Bacteria were infiltrated into leaves of ~4 weeks old *N. benthamiana* plants using a 1ml needleless syringe. At 5 days post infiltration (dpi), detached leaves were imaged under UV light (488nm) on the abaxial side, and scored using ImageJ software according to the scale presented in Suppl. Fig 9.

#### O<sub>2</sub><sup>-</sup> detection

Superoxide anion concentrations were assayed spectrophotometrically as described by Krzymowska et al. (2007)

#### Membrane integrity test

Membrane integrity was performed as described (Preethi et al., 2017).

#### Western blotting

Agroinfiltrated leaves were collected, frozen and ground in liquid nitrogen. Total proteins were extracted as previously described (Grech-Baran et al., 2020). Homogenates were centrifuged at 21,000 g for 10 min, and the supernatants were collected. All tested samples were separated on 12.5% SDS-PAGE and subjected to immunoblot analysis using primary monoclonal Anti-Flag or, Anti-GFP antibodies (Abcam, Cambridge, UK) and alkaline phosphatase-conjugated anti-mouse secondary antibodies (Sigma Aldrich, St-Louis, USA). To detect PPV or TuMV, alkaline phosphatase-conjugated anti-PPV or anti- TuMV antibodies (Bioreba, Reinach, Switzerland) were used. Immunoblots were developed using a NBT/BCIP colourimetric detection kit (BioShop Inc., Canada).

#### SA measurement

Free SA was extracted and quantified essentially as described by Malamy et al., (1990) and. HPLC assayed as described (Krzymowska et al., 2007).

## Transient expression assay

*Agrobacterium* GV3101 strains carrying plasmids expressing PVY CP, its variants or coat proteins of other *Potyviridae* were used to infiltrate *Ry<sub>sto</sub>* transgenic or control *N. tabacum*, as described previously (Grech-Baran et al., 2020). HR-related phenotypes were assayed 2–3 days after infiltration. Each experiment was performed at least twice and included at least three independent biological replicates.

## PPV and TuMV resistance assays

PPV isolates: 0001 (DSMZ No.:PPV-0001) or 2233 (DSMZ No.:PPV-0233) were inoculated, as recommended by German Collection of Microorganisms and Cell Cultures GmbH. Research (DSMZ). PPV-GFP and TuMV-GFP infections were performed as described (Fernández-Fernández et al. 2001; Garcia-Ruiz et al., 2010), respectively.

## Confocal laser scanning microscopy

Subcellular localization of the fusion proteins was evaluated using a Nikon C1 confocal system built on TE2000E and equipped with a 60 Plan-Apochromat oil immersion objective (Nikon Instruments B.V. Europe, Amsterdam, The Netherlands). GFP was excited with the 488 nm line from an argon ion laser, while RFP was excited by a 543 nm helium-neon laser and detected using the 605/75 nm barrier filter. Confocal images were analysed using free viewer EZ-C1 and ImageJ software.

## Statistical analysis

Statistical analyses were conducted using R 3.2.2 within R Studio 0.99.483. Technical replicates consisted of replicate readings from the same plant in the same experiment, whereas biological replicates consisted of measurements obtained from independent plants. Data were analysed using a following pipeline: data were assessed for their suitability for parametric analysis by testing for the normal distribution of the residuals using a Shapiro–Wilk test. If the data were suitable for conducting parametric tests, repeated measures ANOVA followed by Tukey’s HSD ( $p < 0.001^{**}$ ) test were performed.

## Acknowledgments

Research was supported by OPUS 14 (2017/27/B/NZ9/01803) grant from the National Science Centre, Poland to JH. MGB was partially supported by SONATA 15 (2019/35/D/NZ9/03565 ) grant from the National Science Centre, Poland. We would like to thank our co-workers, in particular dr Magdalena Krzymowska and dr Agnieszka I. Witek, for critical comments on the manuscript. Prof Jane Parker and Dr Johannes Stuttmann for sharing seeds of single *pad-4* and double *pad-4, sag101b* *N. benthamiana* knockout plants. Prof Juan Antonio Garcia Alvarez and Dr Véronique Decroocq for sharing PPV-GFP

infectious clone. Prof James Carrington for shearing TuMV-GFP infectious clone. We would like to acknowledge Agata Gorczyca for the technical support.

## Competing interests

The authors declare no competing interests.

## Citations

Agirrezabala, X., Méndez-López, E., Lasso, G., Sánchez-Pina, M.A., Aranda, M., Valle, M., 2015. The near-atomic cryoEM structure of a flexible filamentous plant virus shows homology of its coat protein with nucleoproteins of animal viruses. *eLife* 4, e11795–e11795. <https://doi.org/10.7554/eLife.11795>

Antignus, Y., Lachman, O., Pearlsman, M., Maslenin, L. and Rosner, A., 2008. A new pathotype of Pepper mild mottle virus (PMMoV) overcomes the L4 resistance genotype of pepper cultivars. *Plant Dis.* 92, 1033–1037. <https://doi.org/10.1094/PDIS-92-7-1033>

Baurès, I., Candresse, T., Leveau, A., Bendahmane, A., Sturbois, B., 2008. The Rx Gene Confers Resistance to a Range of Potexviruses in Transgenic Nicotiana Plants. *Mol. Plant-Microbe Interactions*® 21, 1154–1164. <https://doi.org/10.1094/MPMI-21-9-1154>

Białas, A., Langner, T., Harant, A., Contreras, M.P., Stevenson, C.E.M., Lawson, D.M., Sklenar, J., Kellner, R., Moscou, M.J., Terauchi, R., Banfield, M.J., Kamoun, S., 2020. Two NLR immune receptors acquired high-affinity binding to a fungal effector through convergent evolution of their integrated domain. *BioRxiv*, doi: <https://doi.org/10.1101/2021.01.26.428286>

Bosshard, H.R., Marti, D.N., Jelesarov, I., 2004. Protein stabilization by salt bridges: concepts, experimental approaches and clarification of some misunderstandings. *J Mol Recognit.* 17, 1–16. doi: 10.1002/jmr.657. PMID: 14872533

Bourras, S., Kunz, L., Xue, M., Praz, C.R., Müller, M.C., Kälin, C., Schläfli, M., Ackermann, P., Flückiger, S., Parlange, F., Menardo, F., Schaefer, L.K., Ben-David, R., Roffler, S., Oberhaensli, S., Widrig, V., Lindner, S., Isaksson, J., Wicker, T., Yu, D., Keller, B., 2019. The AvrPm3-Pm3 effector-NLR interactions control both race-specific resistance and host-specificity of cereal mildews on wheat. *Nat. Commun.* 10, 2292. <https://doi.org/10.1038/s41467-019-10274-1>

Chichkova, N.V., Kim, S.H., Titova, E.S., Kalkum, M., Morozov, V.S., Rubtsov, Y.P., Kalinina, N.O., Taliansky, M.E., Vartapetian, A.B., 2004. A plant caspase-like protease activated during the hypersensitive response. *Plant Cell* 16, 157–171. <https://doi.org/10.1105/tpc.017889>

Cooley, M.B., Pathirana, S., Wu, H.J., Kachroo, P., Klessig, D.F., 2000. Members of the Arabidopsis HRT/RPP8 family of resistance genes confer resistance to both viral and oomycete pathogens. *Plant Cell* 12, 663–676. <https://doi.org/10.1105/tpc.12.5.663>

da Silva, W., Kutnjak, D., Xu, Yi, Xu, Yimin, Giovannoni, J., Elena, S.F., Gray, S., 2020. Transmission modes affect the population structure of potato virus Y in potato. *PLOS Pathog.* 16, e1008608. <https://doi.org/10.1371/journal.ppat.1008608>

Durner, J., Shah, J., Klessig, D.F., 1997. Salicylic acid and disease resistance in plants. *Trends Plant Sci.* 2, 266–274. [https://doi.org/10.1016/S1360-1385\(97\)86349-2](https://doi.org/10.1016/S1360-1385(97)86349-2)



Fernández-Fernández, M.R., Mouriño, M., Rivera, J., Rodríguez, F., Plana-Durán, J., García, J.A., 2001. Protection of Rabbits against Rabbit Hemorrhagic Disease Virus by Immunization with the VP60 Protein Expressed in Plants with a Potyvirus-Based Vector. *Virology* 280, 283–291.

Flor, H.H., 1956. The Complementary Genic Systems in Flax and Flax Rust\*\*Joint contribution from the Field Crops Research Branch, Agricultural Research Service, United States Department of Agriculture and the North Dakota Agricultural Experiment Station., in: Demerec, M. (Ed.), *Advances in Genetics*. Academic Press, pp. 29–54. [https://doi.org/10.1016/S0065-2660\(08\)60498-8](https://doi.org/10.1016/S0065-2660(08)60498-8)

Friedrich, L., Vernooij, B., Gaffney, T., Morse, A., Ryals, J., 1995. Characterization of tobacco plants expressing a bacterial salicylate hydroxylase gene. *Plant Mol. Biol.* 29, 959–968. <https://doi.org/10.1007/BF00014969>

Gadhav, K.R., Gautam, S., Rasmussen, D.A., Srinivasan, R., 2020. Aphid Transmission of Potyvirus: The Largest Plant-Infecting RNA Virus Genus. *Viruses* 12, 773. <https://doi.org/10.3390/v12070773>

Gantner, J., Ordon, J., Kretschmer, C., Guerois, R., Stuttmann, J., 2019. An EDS1-SAG101 complex is essential for TNL-mediated immunity in *Nicotiana benthamiana*. *Plant Cell*. 31, 2456–2474. doi:10.1105/tpc.19.00099

Garcia-Ruiz, H., Takeda, A., Chapman, E.J., Sullivan, C.M., Fahlgren, N., Bremmelis, K.J., Carrington, J.C., 2010. Arabidopsis RNA-Dependent RNA Polymerases and Dicer-Like Proteins in Antiviral Defense and Small Interfering RNA Biogenesis during Turnip Mosaic Virus Infection. *Plant Cell* 22, 481. <https://doi.org/10.1105/tpc.109.073056>

Grech-Baran, M., Witek, K., Szajko, K., Witek, A.I., Morgiewicz, K., Wasilewicz-Flis, I., Jakuczun, H., Marczewski, W., Jones, J.D.G., Hennig, J., 2020. Extreme resistance to Potato virus Y in potato carrying the Rysto gene is mediated by a TIR-NLR immune receptor. *Plant Biotechnol. J.* 18, 655–667. <https://doi.org/10.1111/pbi.13230>

Hily, J.-M., Ravelonandro, M., Damsteegt, V., Bassett, C., Petri, C., Liu, Z., Scorza, R., 2007. Plum Pox Virus Coat Protein Gene Intron-hairpin-RNA (ihpRNA) Constructs Provide Resistance to Plum Pox Virus in *Nicotiana benthamiana* and *Prunus domestica*. *Journal of the American Society for Horticultural Science J. Amer. Soc. Hort. Sci.* 132, 850–858. <https://doi.org/10.21273/JASHS.132.6.850>

Hofius, D., Maier, A.T., Dietrich, C., Jungkuntz, I., Börnke, F., Maiss, E., Sonnewald, U., 2007. Capsid protein-mediated recruitment of host DnaJ-like proteins is required for Potato virus Y infection in tobacco plants. *J. Virol.* 81, 11870–11880. <https://doi.org/10.1128/JVI.01525-07>

Hoser, R., Żurczak, M., Lichocka, M., Zuzga, S., Dadlez, M., Samuel, M.A., Ellis, B.E., Stuttmann, J., Parker, J.E., Hennig, J., Krzymowska, M., 2013. Nucleocytoplasmic partitioning of tobacco N receptor is modulated by SGT1. *New Phytologist* 200, 158–171. <https://doi.org/10.1111/nph.12347>

Hu, M., Qi, J., Bi, G., Zhou, J.M., 2020. Bacterial effectors induce oligomerization of immune receptor ZAR1 in vivo. *Mol. Plant* 13, 793–801. <https://doi.org/10.1094/MPMI-08-20-0239-IA>

Ilardi, V., Tavazza, M., 2015. Biotechnological strategies and tools for Plum pox virus resistance: trans-, intra-, cis-genesis, and beyond. *Front. Plant Sci.* 6, 379–379. <https://doi.org/10.3389/fpls.2015.00379>

- Jenner, C.E., Sánchez, F., Nettleship, S.B., Foster, G.D., Ponz, F., Walsh, J.A., 2000. The cylindrical inclusion gene of Turnip mosaic virus encodes a pathogenic determinant to the Brassica resistance gene TuRB01. *Mol Plant Microbe Interact.* 13, 1102–8. doi: 10.1094/MPMI.2000.13.10.1102
- Jones, A.M., 2001. Programmed cell death in development and defense. *Plant Physiol.* 125, 94–97. <https://doi.org/10.1104/pp.125.1.94>
- Jones, J.D.G., Vance, R.E., Dangl, J.L., 2016. Intracellular innate immune surveillance devices in plants and animals. *Science* 354, aaf6395. <https://doi.org/10.1126/science.aaf6395>
- Kaneko, Y.H., Inukai, T., Suehiro, N., Natsuaki, T., Masuta, C., 2004. Fine genetic mapping of the TuNI locus causing systemic veinal necrosis by turnip mosaic virus infection in *Arabidopsis thaliana*. *Theor Appl Genet.* 110,33–40. doi: 10.1007/s00122-004-1824-4
- Katoh, K., Toh, H., 2008. Recent developments in the MAFFT multiple sequence alignment program. *Brief Bioinform.* 9, 286–98. doi: 10.1093/bib/bbn013
- Kavanagh, T., Goulden, M., Santa Cruz, S., Chapman, S., Barker, I., Baulcombe, D., 1992. Molecular analysis of a resistance-breaking strain of potato virus X. *Virology* 189, 609–617. [https://doi.org/10.1016/0042-6822\(92\)90584-C](https://doi.org/10.1016/0042-6822(92)90584-C)
- Kežar, A., Kavčič, L., Polák, M., Nováček, J., Gutiérrez-Aguirre, I., Žnidarič, M.T., Coll, A., Stare, K., Gruden, K., Ravnkar, M., Pahovnik, D., Žagar, E., Merzel, F., Anderluh, G., Podobnik, M., 2019. Structural basis for the multitasking nature of the potato virus Y coat protein. *Sci. Adv.* 5, eaaw3808. <https://doi.org/10.1126/sciadv.aaw3808>
- Krieger, E., Vriend, G., 2014. YASARA View-molecular graphics for all devices-from smartphones to workstations. *Bioinforma. Oxf. Engl.* 30. <https://doi.org/10.1093/bioinformatics/btu426>
- Krzyszowska, M., Konopka-Postupolska, D., Sobczak, M., Macioszek, V., Ellis, B.E., Hennig, J., 2007. Infection of tobacco with different *Pseudomonas syringae* pathovars leads to distinct morphotypes of programmed cell death. *Plant J.* 50, 253–264. <https://doi.org/10.1111/j.1365-3113X.2007.03046.x>
- Lapin, D., Kovacova, V., Sun, X., Dongus, J.A., Bhandari, D., von Born, P., Bautor, J., Guarneri, N., Rzemieniewski, J., Stuttmann, J., Beyer, A., Parker, J.E., 2019. A Coevolved EDS1-SAG101-NRG1 Module Mediates Cell Death Signaling by TIR-Domain Immune Receptors. *Plant Cell.* 31, 2430–2455. doi: 10.1105/tpc.19.00118
- Le Roux, C., Huet, G., Jauneau, A., Camborde, L., Trémoussaygue, D., Kraut, A., Zhou, B., Levaillant, M., Adachi, H., Yoshioka, H., Raffaele, S., Berthomé, R., Couté, Y., Parker, J.E., Deslandes, L., 2015. A Receptor Pair with an Integrated Decoy Converts Pathogen Disabling of Transcription Factors to Immunity. *Cell* 161, 1074–1088. <https://doi.org/10.1016/j.cell.2015.04.025>
- Leisner, C.P., Hamilton, J.P., Crisovan, E., Manrique-Carpintero, N.C., Marand, A.P., Newton, L., Pham, G.M., Jiang, J., Douches, D.S., Jansky, S.H., Buell, C.R., 2018. Genome sequence of M6, a diploid inbred clone of the high-glycoalkaloid-producing tuber-bearing potato species *Solanum chacoense*, reveals residual heterozygosity. *Plant J.* 94, 562–570. <https://doi.org/10.1111/tpj.13857>
- Leisner, S., Schoelz, J., 2018. Joining the Crowd: Integrating Plant Virus Proteins into the Larger World of Pathogen Effectors. *Annu. Rev. Phytopathol.* 56. <https://doi.org/10.1146/annurev-phyto-080417-050151>

Li, P., Dong, B., Zhou, H., Zhou, B., 2012. Functional analysis of 2758 WANG Bao-hua et al. Journal of Integrative Agriculture 2017, 16(12): 2746–2760 cysteine residues of the Magnaporthe oryzae avirulence protein AvrPiz-t. Acta Phytopathologica Sinica, 42, 474– 479. (in Chinese)

Liu, D., Shi, L., Han, C., Yu, J., Li, D., Zhang, Y., 2012. Validation of Reference Genes for Gene Expression Studies in Virus-Infected Nicotiana benthamiana Using Quantitative Real-Time PCR. PLOS ONE 7, e46451. <https://doi.org/10.1371/journal.pone.0046451>

Lolle, S., Stevens, D., Coaker, G., 2020. Plant NLR-triggered immunity: from receptor activation to downstream signaling. Innate Immun. 62, 99–105. <https://doi.org/10.1016/j.coi.2019.12.007>

Ma, S., Lapin, D., Liu, L., Sun, Y., Song, W., Zhang, X., Logemann, E., Yu, D., Wang, J., Jirschitzka, J., Han, Z., Schulze-Lefert, P., Parker, J.E., Chai, J., 2020. Direct pathogen-induced assembly of an NLR immune receptor complex to form a holoenzyme. Science 370, eabe3069. <https://doi.org/10.1126/science.abe3069>

Maejima, K., Hashimoto, M., Hagiwara-Komoda, Y., Miyazaki, A., Nishikawa, M., Tokuda, R., Kumita, K., Maruyama, N., Namba, S., Yamaji, Y., 2020. Intra-strain biological and epidemiological characterization of plum pox virus. Mol Plant Pathol. 21, 475– 488. <https://doi.org/10.1111/mpp.12908>

Malamy, J., Carr, J.P., Klessig, D.F., Raskin, I., 1990. Salicylic Acid: A Likely Endogenous Signal in the Resistance Response of Tobacco to Viral Infection. Science 250, 1002. <https://doi.org/10.1126/science.250.4983.1002>

Maqbool, A., Saitoh, H., Franceschetti, M., Stevenson, C., Uemura, A., Kanzaki, H., Kamoun, S., Terauchi, R., Banfield, M., 2015. Structural basis of pathogen recognition by an integrated HMA domain in a plant NLR immune receptor. Elife 4,1–24. doi:10.7554/eLife.08709

Martin, R., Qi, T., Zhang, H., Liu, F., King, M., Toth, C., Nogales, E., Staskawicz, B.J., 2020. Structure of the activated ROQ1 resistosome directly recognizing the pathogen effector XopQ. Science. 370, 6521–eabd9993. doi: 10.1126/science.abd9993

Modarresi, M., Javaran, M. J., Shams-Bakhsh, M., Zeinali, S., Behdani, M., & Mirzaee, M., 2019. Transient expression of anti-VEGFR2 nanobody in Nicotiana tabacum and N. benthamiana. 3 Biotech, 8, 484.doi.org/10.1007/s13205-018-1500-z

Moffett, P., Klessig, D.F., 2008. Plant Resistance to Viruses: Natural Resistance Associated with Dominant Genes, in: Mahy, B.W.J., Van Regenmortel, M.H.V. (Eds.), Encyclopedia of Virology (Third Edition). Academic Press, Oxford, pp. 170–177. <https://doi.org/10.1016/B978-012374410-4.00469-6>

Monger, W.A., Seal, S., Cotton, S. and Foster, G.D., 2001. Identification of different isolates of Cassava brown streak virus and development of a diagnostic test. Plant Pathology, 50. 768–775. <https://doi.org/10.1046/j.1365-3059.2001.00647.x>

Mukhi, N., Gorenkin, D., Banfield, M.J., 2020. Exploring folds, evolution and host interactions: understanding effector structure/function in disease and immunity. New Phytol. 227, 326–333. <https://doi.org/10.1111/nph.16563>

Nakagawa, T., Suzuki, T., Murata, S., Nakamura, S., Hino, T., Maeo, K., Tabata, R., Kawai, T., Tanaka, K., Niwa, Y., Watanabe, Y., Nakamura, K., Kimura, T., Ishiguro, S., 2007. Improved Gateway Binary Vectors: High-Performance Vectors for Creation of Fusion Constructs in Transgenic Analysis of Plants. null 71, 2095–2100. <https://doi.org/10.1271/bbb.70216>

Navarro, J.A., Serra-Soriano, M., Corachán-Valencia, L., Pallás, V., 2020. A conserved motif in three viral movement proteins from different genera is required for host factor recruitment and cell-to-cell movement. *Sci. Rep.* 10, 4758. <https://doi.org/10.1038/s41598-020-61741-5>

Nemykh, M.A., Efimov, A.V., Novikov, V.K., Orlov, V.N., Arutyunyan, A.M., Drachev, V.A., Lukashina, E.V., Baratova, L.A., Dobrov, E.N., 2008. One more probable structural transition in potato virus X virions and a revised model of the virus coat protein structure. *Virology* 373, 61–71  
<https://doi.org/10.1016/j.virol.2007.11.024>

Ngou, B.P.M., Ahn, H.K., Ding, P. and Jones, J.D., 2021. Mutual potentiation of plant immunity by cell-surface and intracellular receptors. *Nature*. doi: 10.1038/s41586-021-03315-7

Palukaitis, P., & Kim, S., 2021. Resistance to Turnip Mosaic Virus in the Family Brassicaceae. *The plant pathology journal*. 37, 1–23. <https://doi.org/10.5423/PPJ.RW.09.2020.0178>

Preethi, NV, PA, V., Vemanna, R.S., MS, S., Makarla, U., 2017. Quantification of Membrane Damage/Cell Death Using Evan's Blue Staining Technique. *Bio-protocol* 7, e2519  
<https://doi.org/10.21769/BioProtoc.2519>

Radojičić, A., Li, X., & Zhang, Y., 2018. Salicylic Acid: A Double-Edged Sword for Programed Cell Death in Plants. *Frontiers in plant science*, 9, 1133. <https://doi.org/10.3389/fpls.2018.01133>

Revers, F., García, J.A., 2015. Chapter Three - Molecular Biology of Potyviruses, in: Maramorosch, K., Mettenleiter, T.C. (Eds.), *Advances in Virus Research*. Academic Press, pp. 101–199  
<https://doi.org/10.1016/bs.aivir.2014.11.006>

Sáenz, P., Salvador, B., Simón-Mateo, C., Kasschau, K., Carrington, J., García, J., 2002. Host-Specific Involvement of the HC Protein in the Long-Distance Movement of Potyviruses. *J. Virol.* 76, 1922–31. <https://doi.org/10.1128/JVI.76.4.1922-1931.2002>

Salvador, B., Saénz, P., Yangüez, E., Quiot, J.B., Quiot, L., Delgadillo, M.O., García, J.A., Simón-Mateo, C., 2008. Host-specific effect of P1 exchange between two potyviruses. *Mol. Plant Pathol.* 9, 147–155. <https://doi.org/10.1111/j.1364-3703.2007.00450.x>

Saur, I.M.L., Panstruga, R., Schulze-Lefert, P., 2020. NOD-like receptor-mediated plant immunity: from structure to cell death. *Nat Rev Immunol.* 8. doi: 10.1038/s41577-020-00473-z

Scholthof, K.B., Adkins, S., Czosnek, H., Palukaitis, P., 2011. Top 10 plant viruses in molecular plant pathology. *Molecular Plant Pathology*. 12, 938–954. doi: 10.1111/j.1364-3703.2011.00752.x

Sun, X., Lapin, D., Feehan, J.M., Stolze, S.C., Kramer, K., Dongus, J.A., Rzemieniewski, J., Blanvillain-Baufume, S., Harzen, A., Bautor, J., Derbyshire, P., Menke, F.L.H., Finkemeier, I., Nakagami, H., Jones, J.D., Parker, J.E., 2020. Pathogen effector recognition-dependent association of NRG1 with EDS1 and SAG101 in TNL receptor immunity. *bioRxiv*. doi:10.1101/2020.12.21.423810

Takahashi, H., Miller, J., Nozaki, Y., Sukanto, Takeda, M., Shah, J., Hase, S., Ikegami, M., Ehara, Y., Dinesh-Kumar, S.P., 2002. RCY1, an Arabidopsis thaliana RPP8/HRT family resistance gene, conferring resistance to cucumber mosaic virus requires salicylic acid, ethylene and a novel signal transduction mechanism. *Plant J.* 32, 655–667. <https://doi.org/10.1046/j.1365-313X.2002.01453.x>

Teixeira, R.M., Ferreira, M.A., Raimundo, G.A.S., Loriato, V.A.P., Reis, P.A.B., Fontes, E.P.B., 2019. Virus perception at the cell surface: revisiting the roles of receptor-like kinases as viral pattern recognition receptors. *Mol Plant Pathol.* 20, 1196–1202. doi: 10.1111/mpp.12816

Tomita, R., Sekine, K.-T., Mizumoto, H., Sakamoto, M., Murai, J., Kiba, A., Hikichi, Y., Suzuki, K., Kobayashi, K., 2010. Genetic Basis for the Hierarchical Interaction Between Tobamovirus spp. and L Resistance Gene Alleles from Different Pepper Species. *Mol. Plant-Microbe Interactions*® 24, 108–117. <https://doi.org/10.1094/MPMI-06-10-0127>

van Wersch, S., Tian, L., Hoy, R., Li, X., 2020. Plant NLRs: The Whistleblowers of Plant Immunity. *Plant Commun.* 1, 100016. <https://doi.org/10.1016/j.xplc.2019.100016>

Wang, J., Hu, M., Wang, J., Qi, J., Han, Z., Wang, G., Qi, Y., Wang, H.W., Zhou, J.M., Chai, J., 2019. Reconstitution and structure of a plant NLR resistosome conferring immunity. *Science*. 364, 6435–eaav5870. doi: 10.1126/science.aav5870

Waterhouse, A.M., Procter, J.B., Martin, D.M., Clamp, M., Barton, G.J., 2009. Jalview Version 2--a multiple sequence alignment editor and analysis workbench. *Bioinformatics*. 25, 1189–91. doi: 10.1093/bioinformatics/btp033.

Whitham, S., Dinesh-Kumar, S.P., Choi, D., Hehl, R., Corr, C., Baker, B., 1994. The product of the tobacco mosaic virus resistance gene N: Similarity to toll and the interleukin-1 receptor. *Cell* 78, 1101–1115. [https://doi.org/10.1016/0092-8674\(94\)90283-6](https://doi.org/10.1016/0092-8674(94)90283-6)

Zamora, M., Méndez-López, E., Agirrezabala, X., Cuesta, R., Lavín, J.L., Sánchez-Pina, M.A., Aranda, M.A., Valle, M., 2017. Potyvirus virion structure shows conserved protein fold and RNA binding site in ssRNA viruses. *Sci. Adv.* 3, eaao2182–eaao2182. <https://doi.org/10.1126/sciadv.aao2182>

Zipfel, C., 2014. Plant pattern-recognition receptors. *Trends Immunol.* 35, 345–351. <https://doi.org/10.1016/j.it.2014.05.004>

Zuriaga, E., Romero, C., Blanca, J.M., Badenes, M.L., 2018. Resistance to Plum Pox Virus (PPV) in apricot (*Prunus armeniaca* L.) is associated with down-regulation of two MATHd genes. *BMC Plant Biol.* 18, 25. doi: 10.1186/s12870-018-1237-1

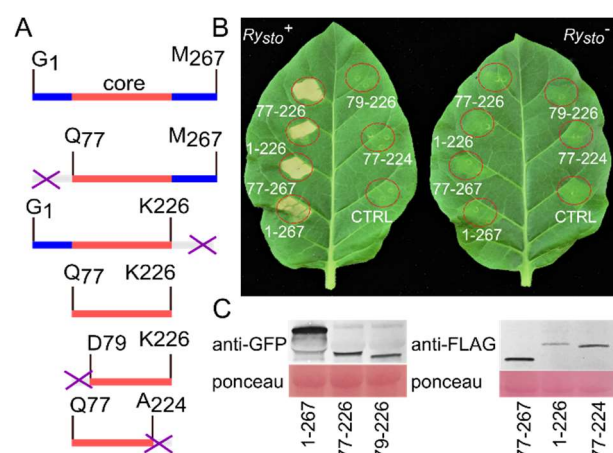

**Fig. 1. Mapping of the minimal CP fragment perceived by *Rysto*.** (a) Schematic representation of PVY CP and corresponding truncations. Blue, unstructured N- and C-terminal regions; pink, the core subdomain; white and crossed out, the deleted fragments. (b) Developments of cell death in leaves of *Rysto* or control tobacco plants infiltrated with *Agrobacterium* expressing full-length CP or its truncated variants. As a negative control (CTRL) empty vector was used. Photographs were taken at 3 days post-infiltration (dpi). (c) *In planta* accumulation of CP variants. For anti-FLAG, and anti-GFP immunoblots of the full-length CP or its truncated variants, total proteins were prepared from the leaves tested at 3 days after agroinfiltration. Staining of RuBisCo with Ponceau S was used as a loading control.



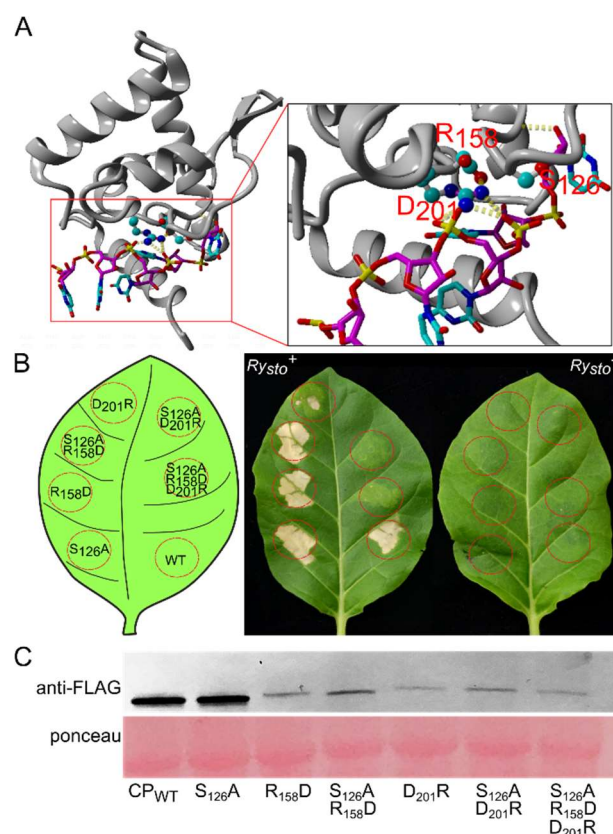

**Fig. 2. Effect of the conserved residues of protein-RNA interaction pocket site on *Rysto*-mediated CP perception.** (a) PVY CP core structural model. Inset: a detailed view of the highly conserved residues S125, R157, and D201 involved in PVY ssRNA binding. Electrostatic interactions are shown as yellow dashed lines. (b) Cell death phenotypes in leaves of *Rysto* transgenic or control tobacco plants infiltrated with *Agrobacterium* expressing CP or mutated CPs with a single, double, or triple amino acid substitution. Photographs were taken at 3 days post-infiltration (dpi). (c) *In planta* accumulation of the CP mutant proteins. For anti-FLAG immunoblots of the full-length CP (positive control) and CP variants, total proteins were prepared from the leaves tested at 3 days after agroinfiltration. Staining of RuBisCo with Ponceau S was used as a loading control.



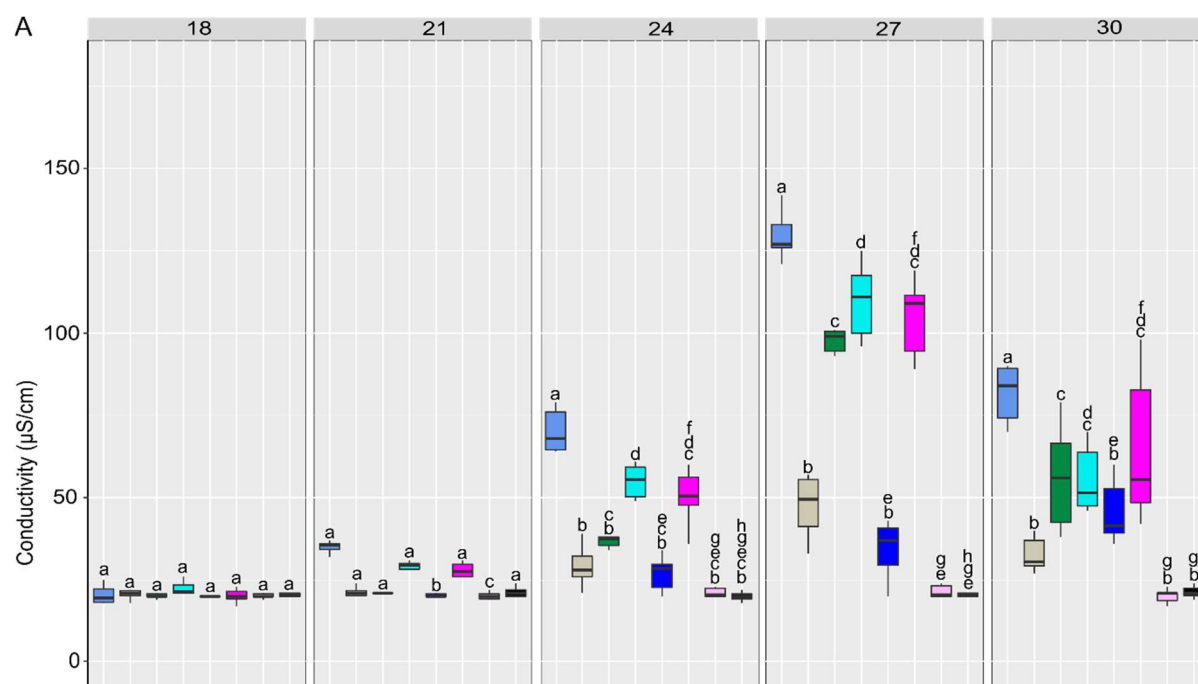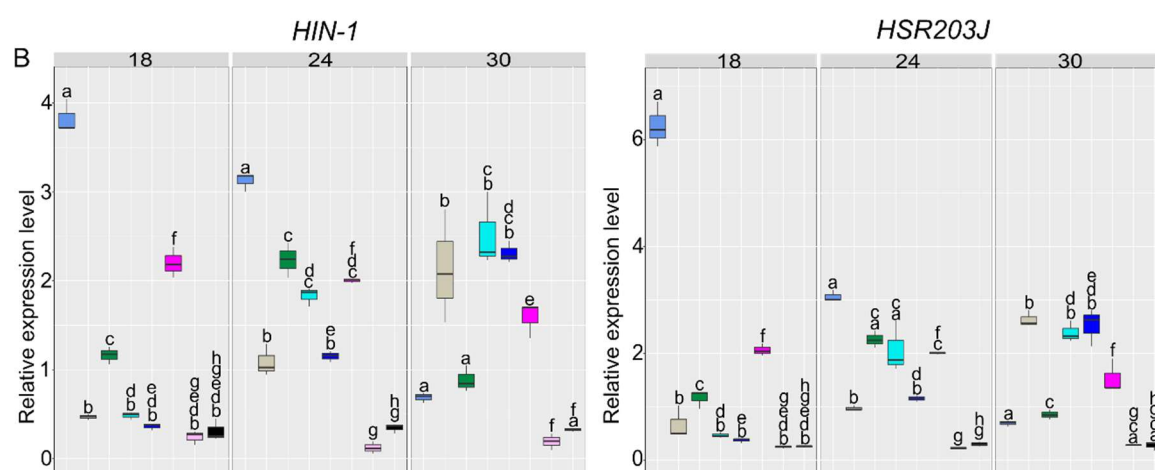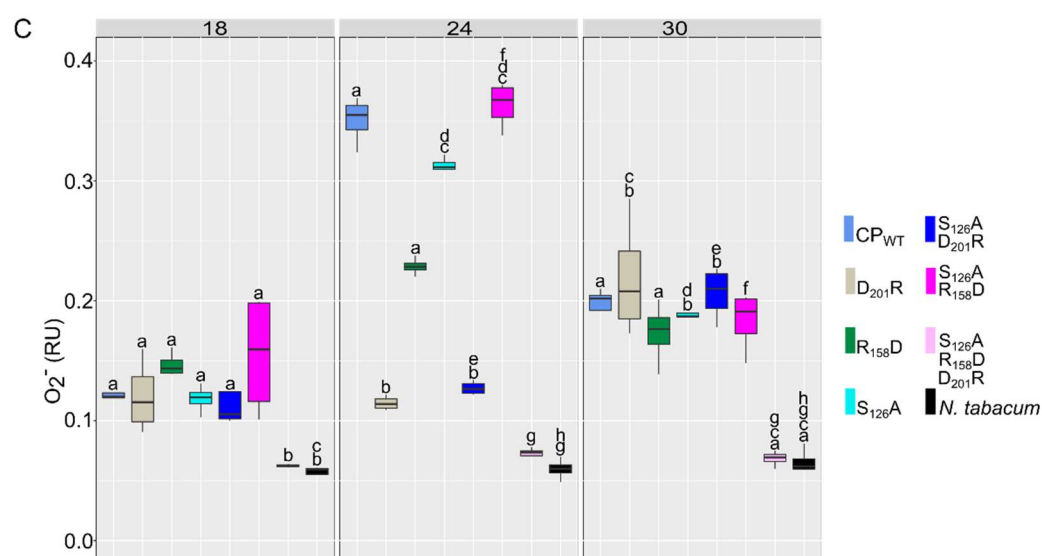

**Fig. 3. Mutations of the conserved residues of CP core are associated with a delayed or abolished onset of *Ry<sub>sto</sub>* detection.** (a) Cell death measured by ion leakage in leaf discs from *Ry<sub>sto</sub>* transgenic tobacco leaves infiltrated with *Agrobacterium* carrying CP or its indicated variants. As a negative control nontransgenic *N. tabacum* infiltrated with the full-length CP was used. The electroconductivity was measured at 3 h intervals from 18 to 30 hours post-infiltration (hpi);  $n = 8$ . (b) Quantitative RT-PCR analysis of the defence response marker genes. *HIN-1* and *HSR203J* transcript accumulation was measured at 18, 24, and 30 hpi. *EF1* and *L23* expression were used as references. (c) ROS burst measured by the concentration of superoxide anion ( $O_2^-$ ) detected in tested leaf discs in the presence of 0.05% nitroblue tetrazolium (w/v). Samples were collected every 3 h.  $O_2^-$  content is expressed in relative units ( $RU = A_{560}/6.3 \text{ cm}^2$ );  $n = 8$ .

Data from each experiment were analysed using a repeated-measures ANOVA followed by Tukey's HSD post-hoc test performed separately for each time point. Letters correspond to statistically homogeneous groups ( $p < 0.001$ ).

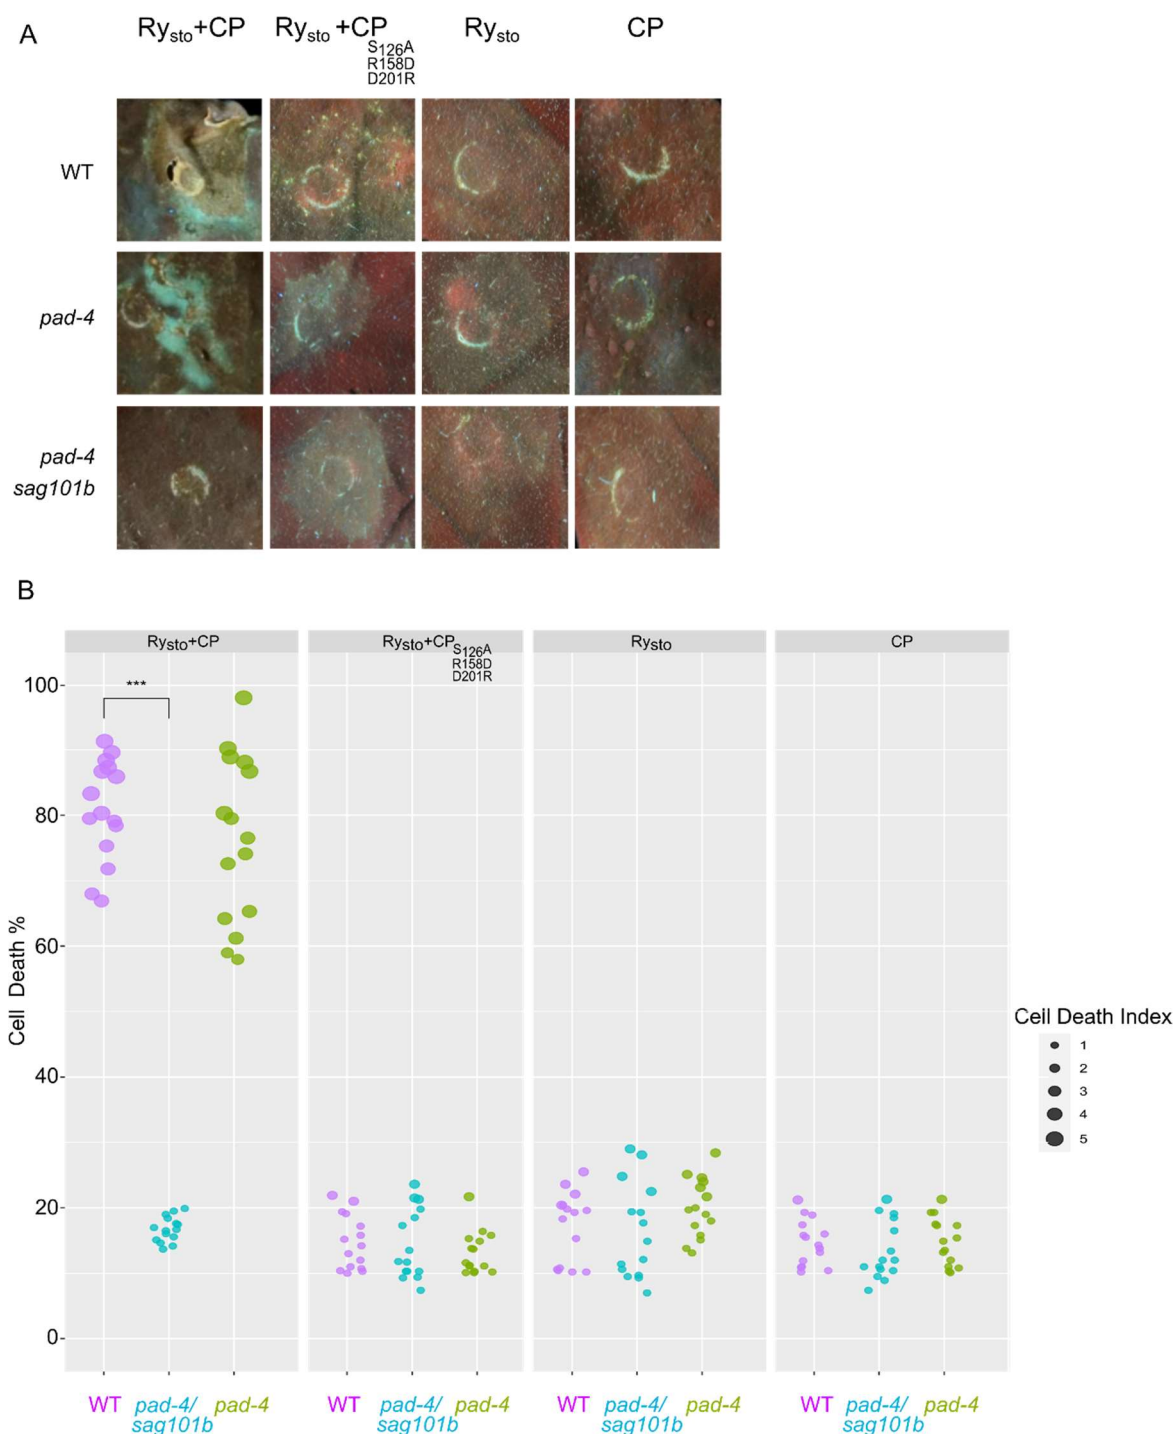

**Fig 4. Ry<sub>sto</sub>-mediated immune response towards PVY CP is abolished in *sag101b* but not in *pad4* knockout lines.** (a) Representative images of cell death phenotype after transient co-expression of the Ry<sub>sto</sub> with PVY CP or Ry<sub>sto</sub> with CP triple mutant in *pad-4*, or *pad-4/sag101b* *N. benthamiana* knockouts alongside with the wild-type control. The leaves were photographed five days after infiltration under UV light. CP triple mutant was used as a negative control. Cell death was scored five days after agroinfiltration (b). The results are presented as dot plots where the colour of a dot is proportional to the number of samples with the same score (count) within the same biological replicate. The statistical analysis was performed using ANOVA with post-hoc Dunnett's test. The experiment was independently repeated at least three times.

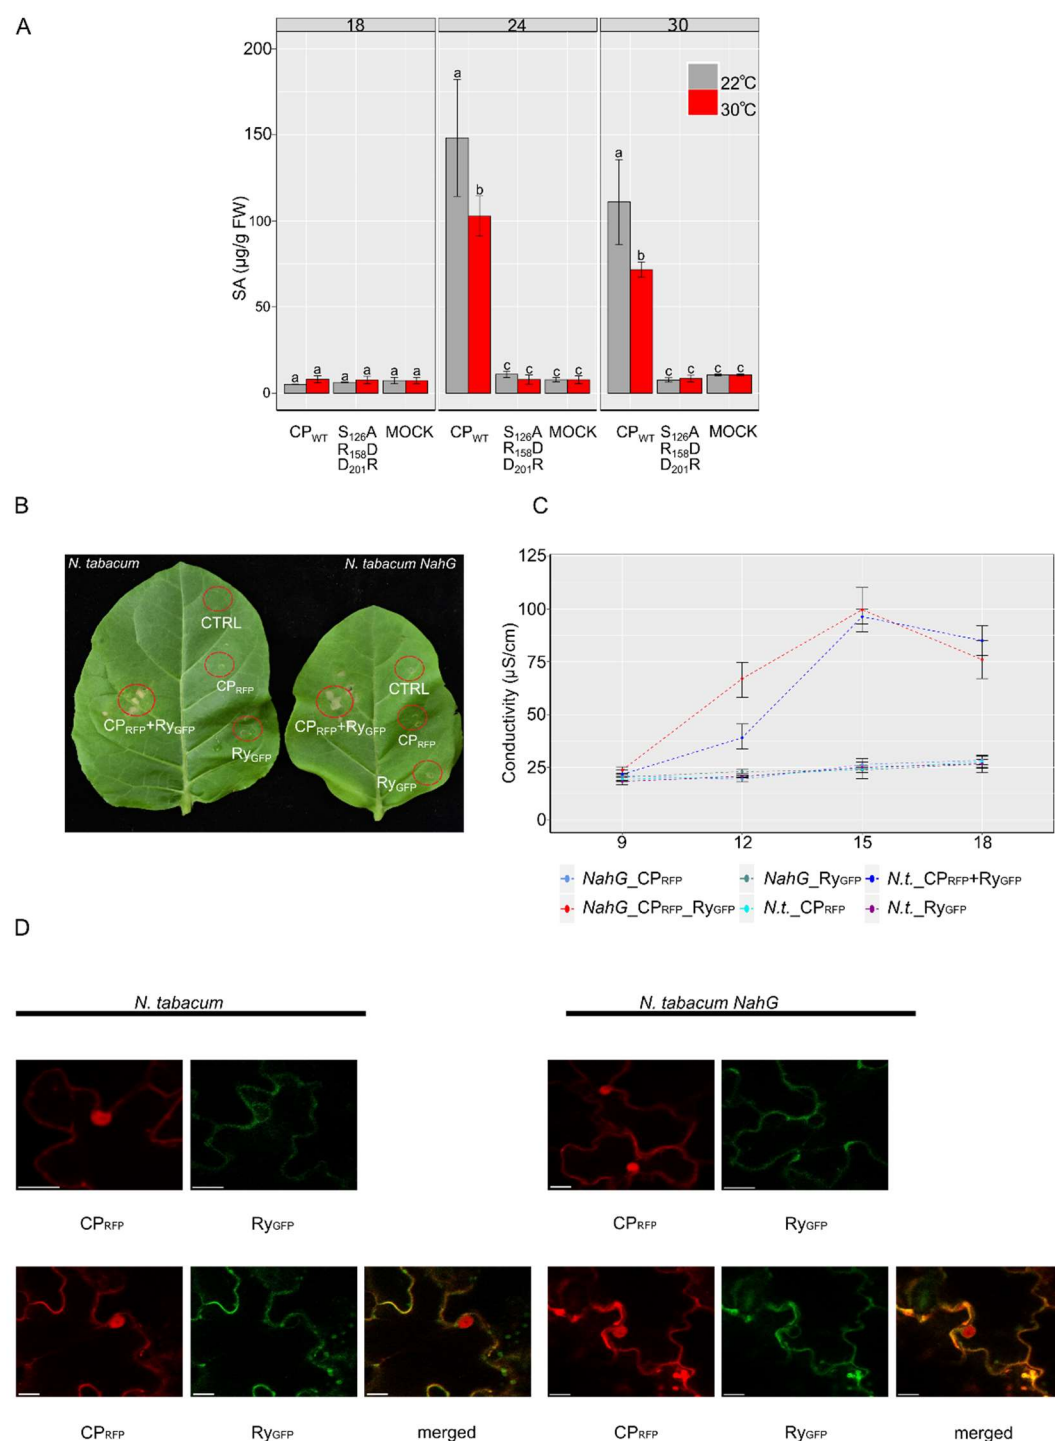

**Fig. 5. Role of SA in CP-triggered immunity in *Ry<sub>sto</sub>* plants.** (a) Changes in free SA levels in *Ry<sub>sto</sub>* transgenic plants in response to CP under standard or elevated temperature conditions. Expression of the triple CP mutant or mock inoculation were used as a negative and positive control, respectively. At selected time points, samples of the plants tested were harvested and SA levels were measured by HPLC. Statistical analysis was performed using a one-way ANOVA with Tuckey's HSD test ( $p < 0,01$ ). (b) *Ry<sub>sto</sub>* and CP co-expression results in tissue collapse in SA-deficient plants. Leaves of control or *NahG*.

*tabacum* plants were infiltrated with *Agrobacterium* expressing Ry<sub>sto</sub> or CP, or a combination of both. The photograph was obtained at 72 hours post-infiltration (hpi). Empty vector was used as a control. Expression of the *NahG* transcript was confirmed via semi-quantitative RT-PCR (Suppl. Fig. 7). (c) Ion leakage showing no differences in cell membrane permeability between *NahG* and control tobacco after CP and Ry<sub>sto</sub> co-expression. Statistical analysis was performed using Student's *t*-test. (d) Cellular localisation of CP and Ry<sub>sto</sub> in representative *NahG* or control tobacco leaf epidermal cells transiently expressing CP, Ry<sub>sto</sub>, or both. Confocal images were obtained 72 hpi. For each variant, approximately 50 transformed cells were examined. Bars = 10 µm.

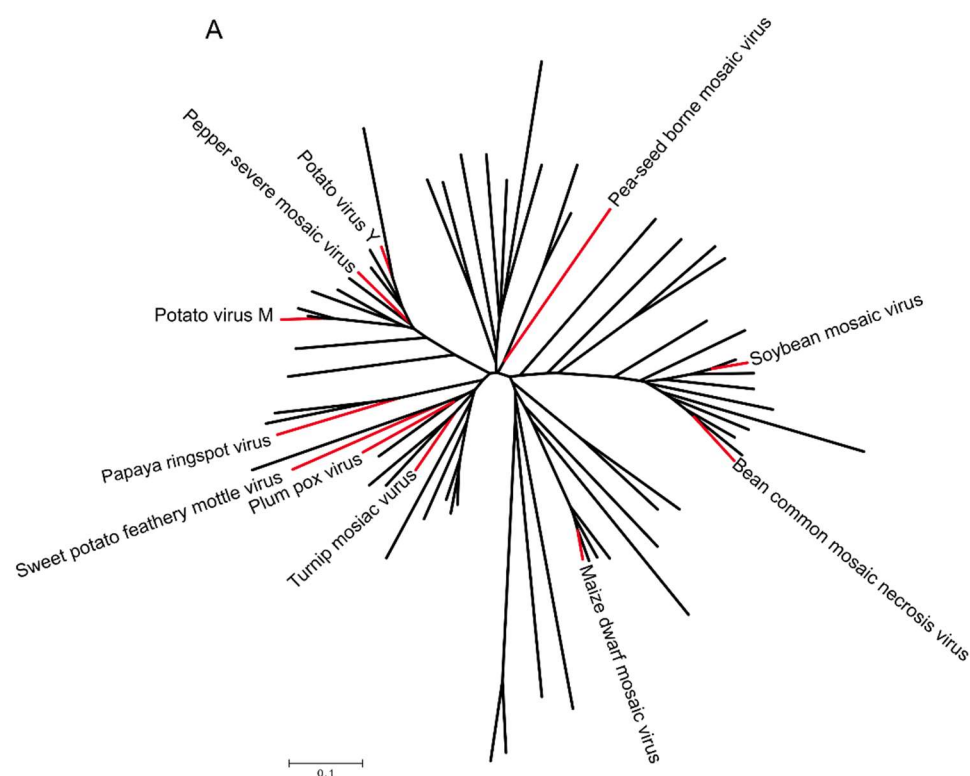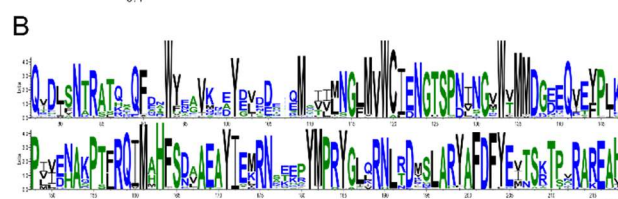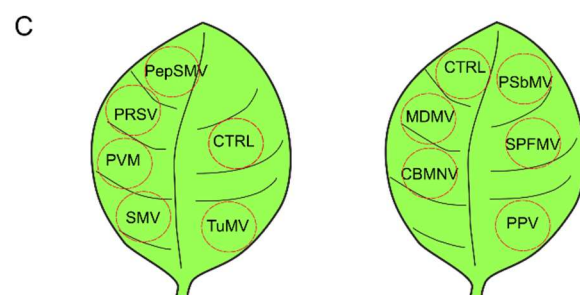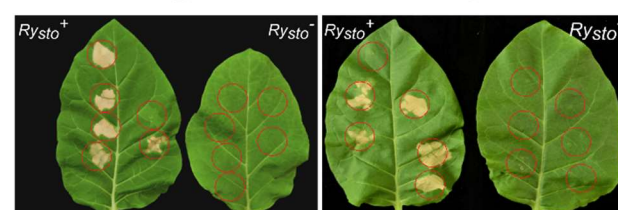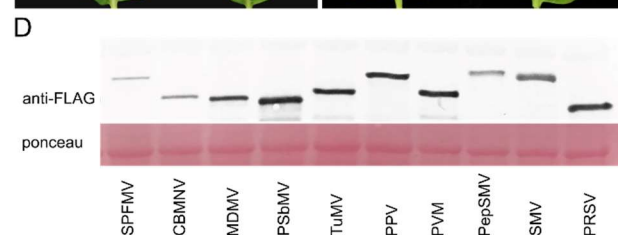

**Fig. 6. Coat proteins of multiple potyviruses that share a conserved structure trigger  $Ry_{sto}$ -mediated immunity.** (a) Phylogeny of *Potyviridae* CPs based on the amino acid sequences aligned using ClustalW and calculated with Mega7. Cloned sequences are marked in red. (b) Sequence logo analysis of CPs of 65 potyviruses depicting the conservation of the predicted core region, including the  $S_{126\_R_{157\_D_{201}}$  ssRNA pocket binding site. (c) CPs of various potyviruses trigger  $Ry_{sto}$ -mediated immunity.  $Ry_{sto}$  or control tobacco plants were agroinfiltrated with multiple potyviral CPs: PRSV, papaya ringspot virus; PVM, potato virus M; SMV, soybean mosaic virus; PepSMV, pepper severe mosaic virus; CBMNV, bean common mosaic necrosis virus; MDMV, maize dwarf mosaic virus; TuMV, turnip mosaic virus; PSbMV, pea-seed born mosaic virus; SPFMV, sweet potato feathery mottle virus; or PPV, plum pox virus. All of them elicit  $Ry_{sto}$ -dependent immune response. The photographs were obtained at 72 hours post-infiltration (hpi). Empty vector was used as a negative control (CTRL). (d) *In planta* accumulation of the potyviral CPs. For anti-FLAG immunoblots of viral CPs total protein extracts were prepared from leaves tested at 3 days after agroinfiltration. Staining of RuBisCo with Ponceau S was used as a loading control.



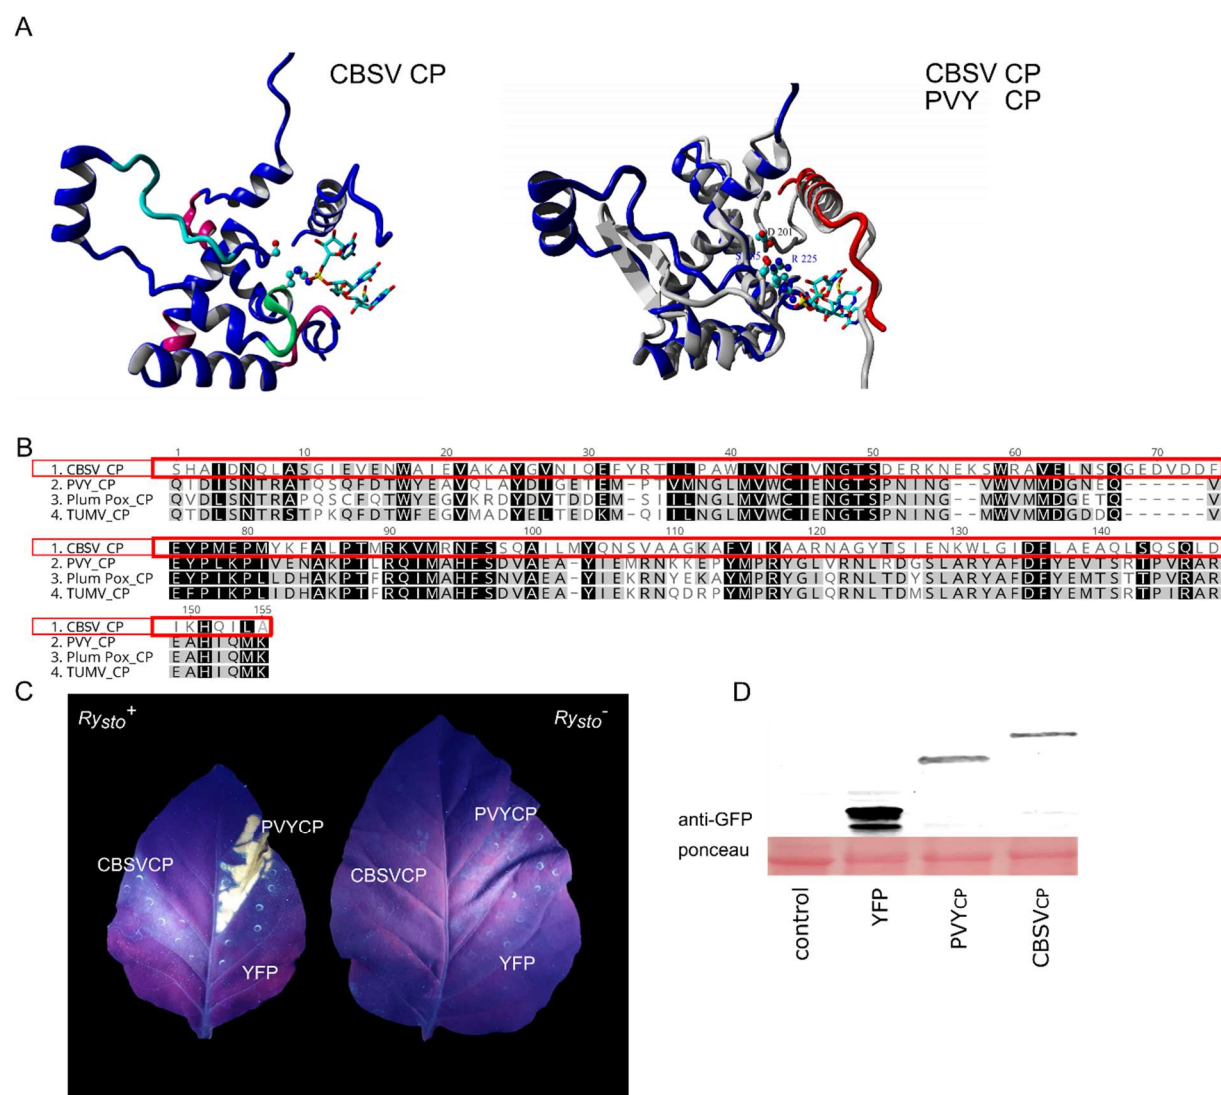

**Fig. 7. Variation in potyviral CPs core domain architecture results in lack of recognition by  $Ry_{sto}$ .** (a) The overall structure of CBSV CP (left) and structural alignment of CBSV and PVY CPs (right). The CBSV CP's N-terminus - blue, C-terminus - red and PVY CP structure - grey (b) Amino acid sequence alignment of the predicted core regions of CPs from representative potyviruses recognised by  $Ry_{sto}$  vs. CBSV (red frame) (c) A representative image showing that CBSV CP is unable to elicit cell death in  $Ry_{sto}$ -expressing plants.  $Ry_{sto}$  transgenic and control tobacco plants were infiltrated with *Agrobacterium* expressing PVY CP-GFP, CBSV CP-GFP, or YFP alone as a control. Cell death development was observed only in  $Ry_{sto}$  plants for PVY CP. The image was taken under UV light (365nm). (d) *In planta* accumulation of the viral CPs. Total protein extract was obtained from  $Ry_{sto}$ -expressing plants at 72 hpi. Staining of RuBisCo with Ponceau S was used as a loading control.

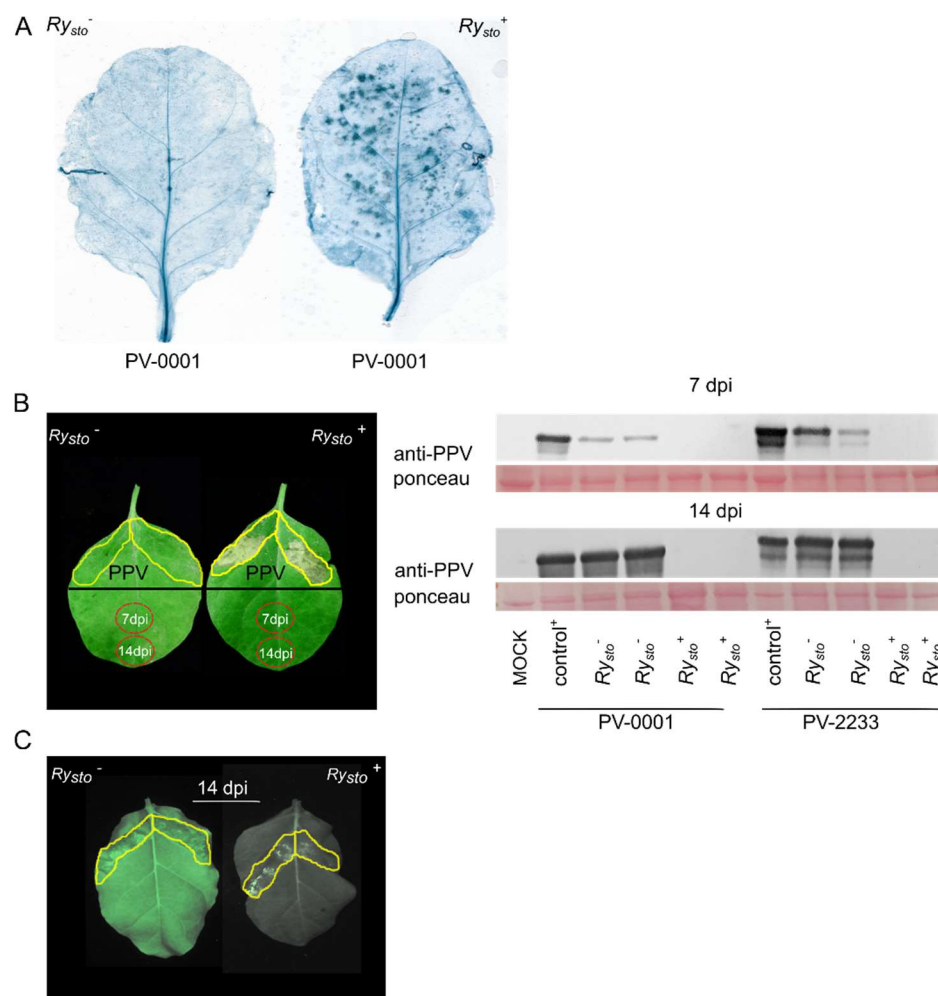

**Fig. 8. PPV triggers resistance response in *Ry<sub>sto</sub>*-expressing tobacco plants.** (a) PPV-induced cell death development visualised by trypan blue staining in *Ry<sub>sto</sub>*-expressing or control, tobacco plants locally inoculated with a severe PPV isolate (PV-0001, DSMZ). At 7 dpi, *Ry<sub>sto</sub>* plants exhibited a local cell death, whereas controls remained symptomless. (b) *Ry<sub>sto</sub>* confers resistance to short-distance PPV movement. *Ry<sub>sto</sub>* transgenic and control plants were site-infected with different PPV isolates (PV-0001 or PV-2233, DSMZ). At 7 and 14 dpi, samples from consecutive leaf zones were harvested and PPV proteins were detected using anti-PPV antibodies. Staining of RuBisCo with Ponceau S was used as a loading control. (c) Leaves of *Ry<sub>sto</sub>*-expressing and control plants were agroinfiltrated with PPV tagged with GFP. The viral spread was monitored by GFP- fluorescence. Photographs were obtained at 14 dpi under blue light (488 nm).

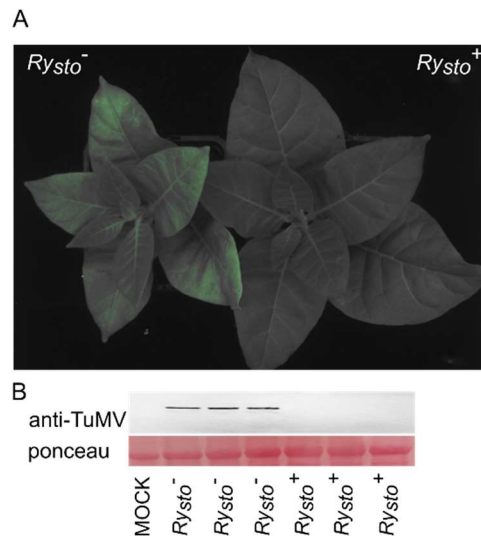

**Fig 9. *Rysto* confers systemic resistance to turnip mosaic virus (TuMV).** (a) *Rysto*-expressing and control tobacco plants were infected by agroinfiltrated with TuMV - GFP. After 21 dpi control plants showed intensive GFP- fluorescence, while no signal was detected in *Rysto*-expressing plants. The photograph was taken under blue light (488 nm). (b) SDS-PAGE analysis of samples from leaves of different tested plants was performed with anti-TuMV antibodies. Staining of RuBisCo with Ponceau S was used as a loading control.
